# Supplementary material for: Effect of Ferric Carboxymaltose on Exercise Capacity in Patients With Chronic Heart Failure and Iron Deficiency
Source: PubMed Central journal article supplement (PMC5642327; doi:10.1161/circulationaha.117.027497), 2017-10-09

## **SUPPLEMENTAL MATERIAL**

## **Appendix**

Participants of the EFFECT-HF study:

Steering Committee: Dirk J. van Veldhuisen (chair); Piotr Ponikowski (co-chair), Alain Cohen-Solal, Michael Böhm, Marco Metra, Peter van der Meer, Artem Doletsky, Adriaan A. Voors, Iain Macdougall, and Viviane Conraads and Henry Krum.

Data Safety and Monitoring Board: Henry Dargie (chair), Rudolf Wuthrich, and Peter Shabe (Statistician). Endpoint Adjudication Committee: Stefan D. Anker (Chair), Gerasimos Filippatos, Frank Ruschitzka.

Supplementary Figure 1: **Association between the change in Peak VO<sub>2</sub> and the change in Hemoglobin at week 24 (LOCF).**

There was no association between the effect of FCM on Peak VO<sub>2</sub> and the effect on Hemoglobin ( $r=-0.0758$ ,  $p=0.51$ ).

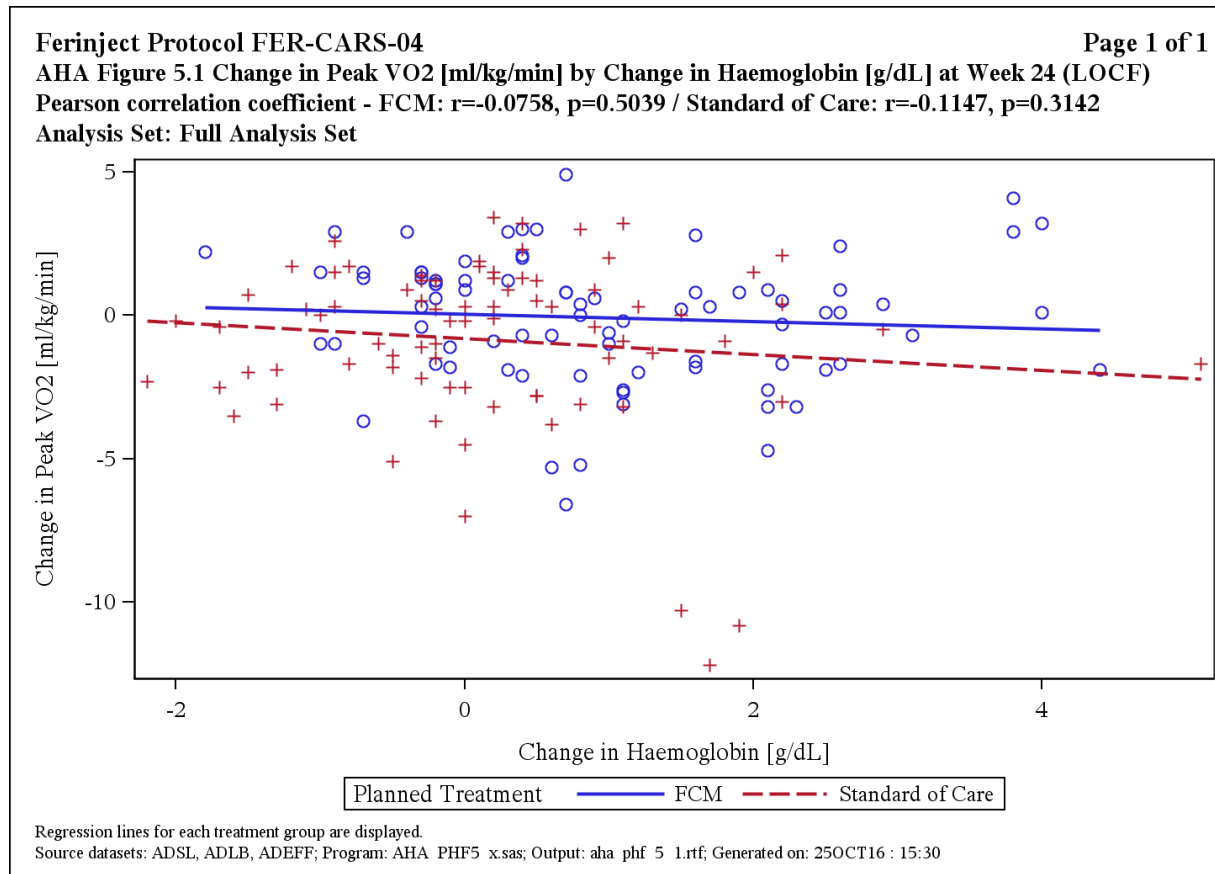

Supplementary Figure 2: **Effect of FCM on NYHA functional class**

Values are changes compared to baseline and relative to the change in the control (standard of care) group, whereby an Odds ratio (OR) > 1.0 means effect in the FCM group is better than the standard of care group.

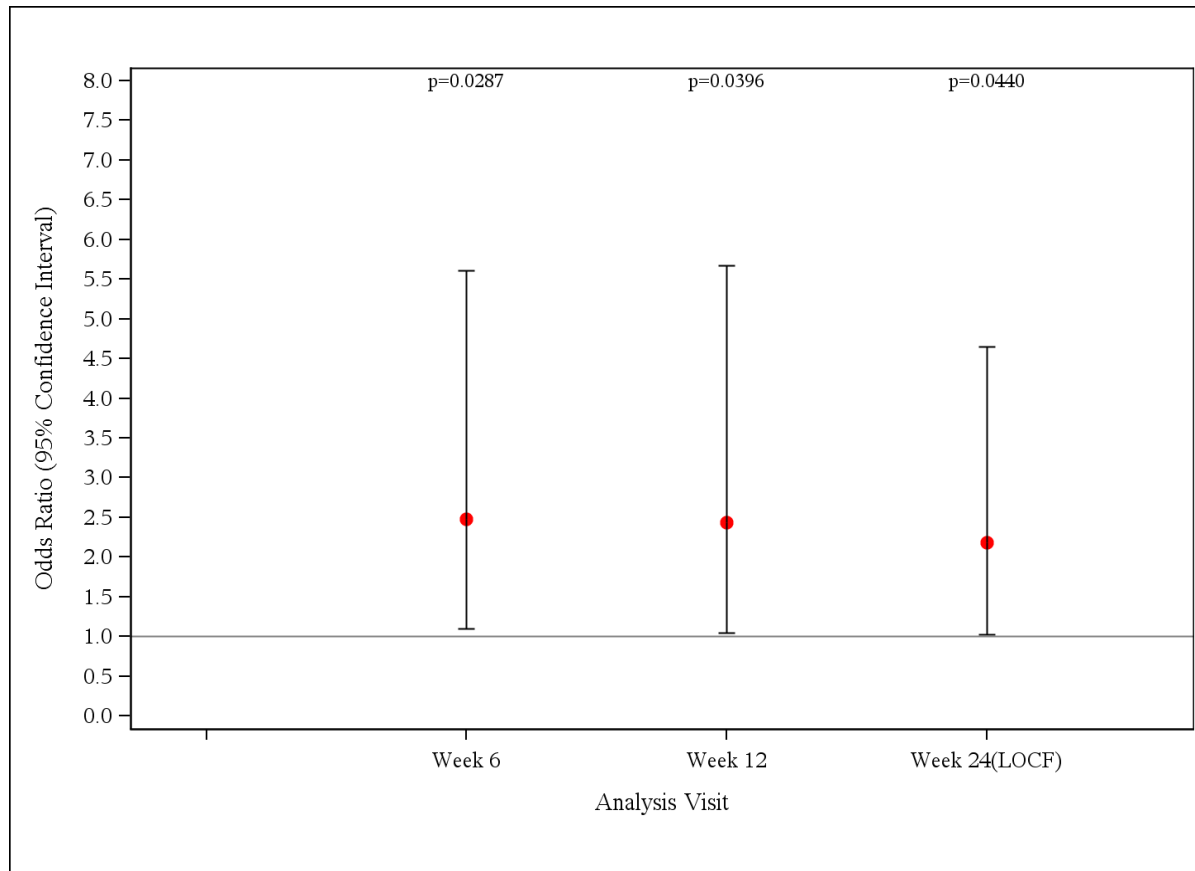

Supplementary Figure 3: **Effect of FCM on PGA score.**

Values are changes compared to baseline and relative to the change in the control (standard of care) group, whereby an Odds ratio (OR) > 1.0 means effect in the FCM group is better than the standard of care group.

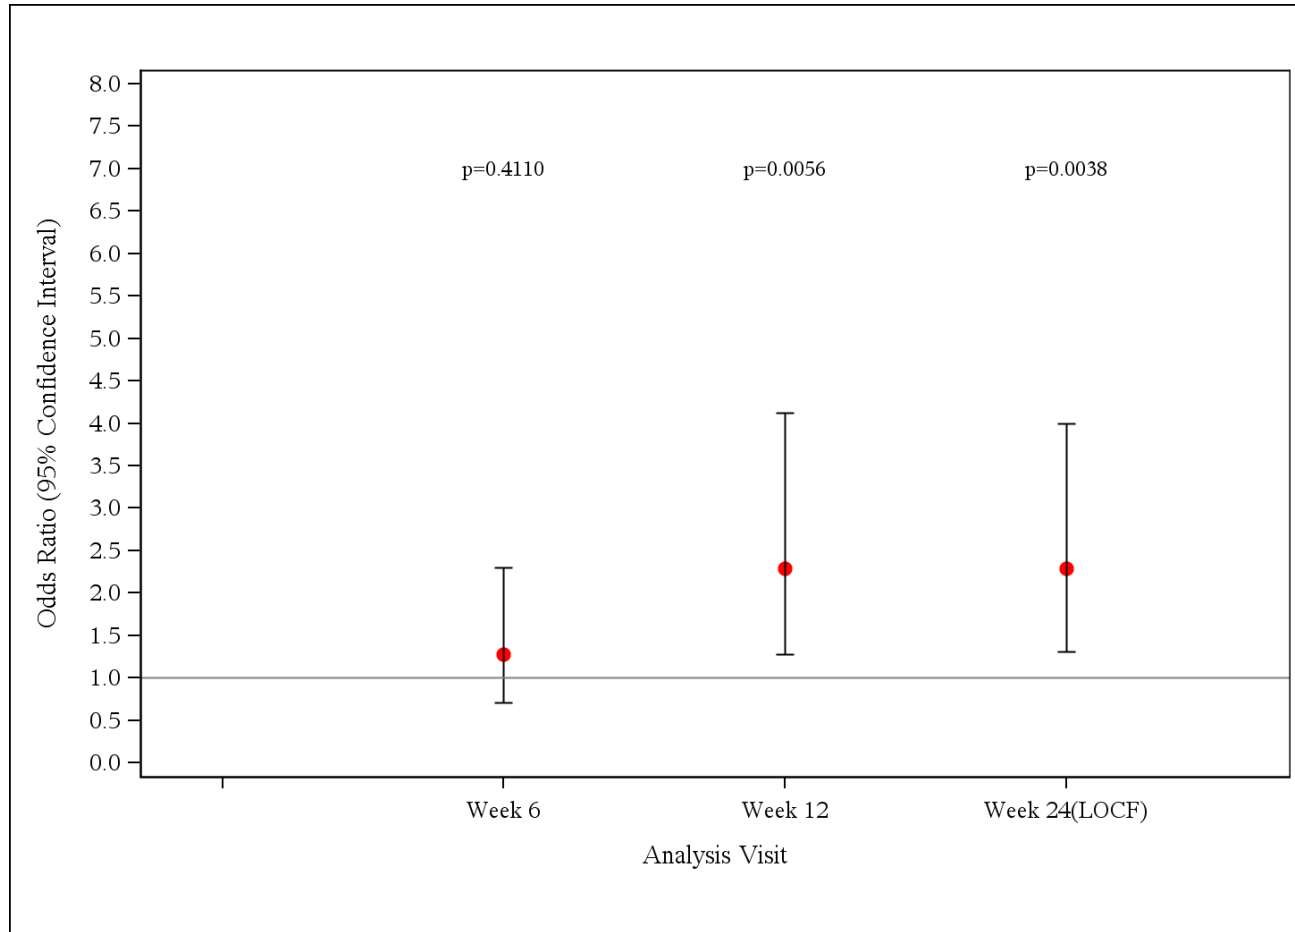

Supplement: cir-136-1374-s001.pdf [file cir-136-1374-s001.pdf]
